# Supplementary material for: Feature integration within discrete time windows
Source: PubMed Central journal article supplement (PMC6814726; doi:10.1038/s41467-019-12919-7), 2019-10-25
Supplement: 41467_2019_12919_MOESM2_ESM.pdf [file 41467_2019_12919_MOESM2_ESM.pdf]

**Title:** Supplementary Movie 1.

**Description:** In the Sequential Metacontrast paradigm (SQM), a central line is followed by pairs of flanking lines presented one after the other further and further away from the center. A percept of two moving streams diverging from the center is elicited. The central line is invisible because it is masked by the following lines.
